# Supplementary material for: Validation of non‐muscle‐invasive bladder cancer risk stratification updated in the 2021 European Association of Urology guidelines
Source: PubMed Central journal article supplement (PMC10869660; doi:10.1002/bco2.305), 2023-11-03
Supplement: BCO2-5-269-s001.pdf [file BCO2-5-269-s001.pdf]

**Table S2. The EORTC, CUETO, and J-NICE risk tables for calculating recurrence, progression, and cancer-specific death scores**

| Factor                     | The EORTC risk table      |                            | The CUETO risk table      |                            | The J-NICE risk table     |                            |                                         |
|----------------------------|---------------------------|----------------------------|---------------------------|----------------------------|---------------------------|----------------------------|-----------------------------------------|
|                            | Recurrence<br>(6 factors) | Progression<br>(6 factors) | Recurrence<br>(6 factors) | Progression<br>(6 factors) | Recurrence<br>(6 factors) | Progression<br>(5 factors) | Cancer-specific<br>death<br>(2 factors) |
| Tumor multifocality        |                           |                            |                           |                            |                           |                            |                                         |
| Single                     | 0                         | 0                          | 0                         | 0                          | 0                         | 0                          | -                                       |
| Multifocal (2–3)           | 3                         | 3                          | 0                         | 0                          | 2                         | 2                          | -                                       |
| Multifocal (4–7)           | 3                         | 3                          | 2                         | 1                          | 2                         | 2                          | -                                       |
| Multifocal (≥ 8)           | 6                         | 3                          | 2                         | 1                          | 2                         | 2                          | -                                       |
| Tumor size                 |                           |                            |                           |                            |                           |                            |                                         |
| < 3 cm                     | 0                         | 0                          | -                         | -                          | 0                         | 0                          | -                                       |
| ≥ 3 cm                     | 3                         | 3                          | -                         | -                          | 2                         | 2                          | -                                       |
| Prior recurrence history   |                           |                            |                           |                            |                           |                            |                                         |
| Primary case               | 0                         | 0                          | 0                         | 0                          | 0                         | 0                          | -                                       |
| Recurrent case (0–1/year)  | 2                         | 2                          | 4                         | 2                          | 6                         | 6                          | -                                       |
| Recurrent case (≥ 2/year)  | 4                         | 2                          | 4                         | 2                          | 6                         | 6                          | -                                       |
| T category                 |                           |                            |                           |                            |                           |                            |                                         |
| Ta                         | 0                         | 0                          | -                         | 0                          | 3                         | -                          | -                                       |
| T1                         | 1                         | 4                          | -                         | 2                          | 0                         | -                          | -                                       |
| Carcinoma in situ          |                           |                            |                           |                            |                           |                            |                                         |
| No                         | 0                         | 0                          | 0                         | 0                          | -                         | -                          | -                                       |
| Yes                        | 1                         | 6                          | 2                         | 1                          | -                         | -                          | -                                       |
| Tumor grade (WHO1973)      |                           |                            |                           |                            |                           |                            |                                         |
| G1                         | 0                         | 0                          | 0                         | 0                          | -                         | -                          | -                                       |
| G2                         | 1                         | 0                          | 1                         | 2                          | -                         | -                          | -                                       |
| G3                         | 2                         | 5                          | 3                         | 6                          | -                         | -                          | -                                       |
| Tumor grade (WHO2004/2016) |                           |                            |                           |                            |                           |                            |                                         |
| Low-grade                  | -                         | -                          | -                         | -                          | 0                         | 0                          | 0                                       |
| High-grade                 | -                         | -                          | -                         | -                          | 2                         | 7                          | 4                                       |
| Age                        |                           |                            |                           |                            |                           |                            |                                         |
| < 60 yo                    | -                         | -                          | 0                         | 0                          | 0                         | -                          | 0                                       |
| 60–70 yo                   | -                         | -                          | 1                         | 0                          | 0                         | -                          | 0                                       |
| > 70 yo                    | -                         | -                          | 2                         | 2                          | 1                         | -                          | 1                                       |
| Sex                        |                           |                            |                           |                            |                           |                            |                                         |
| Male                       | -                         | -                          | 0                         | -                          | -                         | 0                          | -                                       |
| Female                     | -                         | -                          | 3                         | -                          | -                         | 2                          | -                                       |
| <b>Total scores</b>        |                           |                            |                           |                            |                           |                            |                                         |
|                            | 0–17                      | 0–23                       | 0–16                      | 0–14                       | 0–16                      | 0–19                       | 0–5                                     |
| <b>Risk stratification</b> |                           |                            |                           |                            |                           |                            |                                         |
| Low risk                   | 0                         | 0                          | 0–4                       | 0–4                        | 0–4                       | 0–2                        | 0–1                                     |
| Intermediate risk          | 1–4                       | 2–6                        | 5–6                       | 5–6                        | 5–6                       | 3–9                        | 4                                       |
| High risk                  | 5–9                       | 7–13                       | 7–9                       | 7–9                        | 7–16                      | 10–19                      | 5                                       |
| Highest risk               | 10–17                     | 14–23                      | 10–16                     | 10–14                      | -                         | -                          | -                                       |

EORTC, European Organization for Research and Treatment of Cancer; CUETO, Club Urológico Español de Tratamiento Oncológico; J-NICE, Japanese Nishinohon uro-onCology Extensive collaboration group; WHO, the World Health Organization
