# Supplementary material for: Validation of non‐muscle‐invasive bladder cancer risk stratification updated in the 2021 European Association of Urology guidelines
Source: PubMed Central journal article supplement (PMC10869660; doi:10.1002/bco2.305), 2023-11-03
Supplement: BCO2-5-269-s002.pdf [file BCO2-5-269-s002.pdf]

**Table S1. Clinical composition of the former and current EAU NMIBC prognostic factor risk groups based on the WHO1973 and WHO2004/2016 grading systems**

| Risk group                                                                       | The 2019 EAU NMIBC prognostic factor risk groups                                                                                                                                                                                                                                                                                                                                    | The 2021 EAU NMIBC prognostic factor risk groups based on the WHO1973 and WHO2004/2016 grading systems                                                                                                                                                                                                                                                                                                                                                                                                                                                                                               |
|----------------------------------------------------------------------------------|-------------------------------------------------------------------------------------------------------------------------------------------------------------------------------------------------------------------------------------------------------------------------------------------------------------------------------------------------------------------------------------|------------------------------------------------------------------------------------------------------------------------------------------------------------------------------------------------------------------------------------------------------------------------------------------------------------------------------------------------------------------------------------------------------------------------------------------------------------------------------------------------------------------------------------------------------------------------------------------------------|
| Low risk                                                                         | Primary, solitary, TaG1 (PUNLMP, LG), <3 cm, no CIS                                                                                                                                                                                                                                                                                                                                 | <ul style="list-style-type: none"> <li>● A primary, single, Ta LG/G1 tumor ≤3 cm in diameter without CIS in a patient ≤70 yo</li> <li>● A primary LG/G1 tumor with at most one of the following additional clinical risk factors:                             <ul style="list-style-type: none"> <li>◇ Age &gt; 70 yo</li> <li>◇ Multiple tumor</li> <li>◇ Tumor diameter ≥ 3 cm</li> <li>◇ T1 tumor</li> </ul> </li> </ul>                                                                                                                                                                          |
| Intermediate risk                                                                | All tumours not defined in the other categories (between the category of low and high risk)                                                                                                                                                                                                                                                                                         | Patients without CIS who are not included in either the low-, high-, or very high-risk groups                                                                                                                                                                                                                                                                                                                                                                                                                                                                                                        |
| High risk                                                                        | <p>Any of the following:</p> <ul style="list-style-type: none"> <li>● T1 tumour</li> <li>● HG/G3 tumour</li> <li>● CIS</li> <li>● Multiple, recurrent, and large (&gt;3 cm) Ta LG/G1+2 tumours (all features must be present)</li> </ul>                                                                                                                                            | <ul style="list-style-type: none"> <li>● All T1 HG/G3 without CIS, except those included in the very high-risk group</li> </ul> <p>Stage, grade with additional clinical risk factors:</p> <ul style="list-style-type: none"> <li>● Ta LG/G2 or T1 G1, no CIS with all 3 risk factors</li> <li>● Ta HG/G3 or T1 LG, no CIS with at least 2 risk factors</li> <li>● T1 G2, no CIS with at least 1 risk factor</li> <li>◇ Age &gt; 70 yo</li> <li>◇ Multiple tumor</li> <li>◇ Tumor diameter ≥ 3 cm</li> </ul>                                                                                         |
| Highest risk in the 2019 EAU model<br>or<br>Very high risk in the 2021 EAU model | <p>Subgroup in the high-risk group</p> <p>Any of the following:</p> <ul style="list-style-type: none"> <li>● T1 HG/G3 with concurrent bladder CIS</li> <li>● Multiple and/or large and/or recurrent T1 HG/G3</li> <li>● T1 HG/G3 with CIS in the prostatic urethra</li> <li>● Some forms of variant histology of urothelial carcinoma</li> <li>● Lymphovascular invasion</li> </ul> | <p>Stage, grade with additional clinical risk factors:</p> <ul style="list-style-type: none"> <li>● Ta HG/G3 and CIS with all 3 risk factors</li> <li>● T1 G2 and CIS with at least 2 risk factors</li> <li>● T1 HG/G3 and CIS with at least 1 risk factor</li> <li>● T1 HG/G3 no CIS with all 3 risk factors</li> <li>◇ Age &gt; 70 yo</li> <li>◇ Multiple tumor</li> <li>◇ Tumor diameter ≥ 3 cm</li> <li>● Patients with CIS in the prostatic urethra, lymphovascular invasion, and micropapillary, plasmacytoid, sarcomatoid, or neuroendocrine variant histology should be included.</li> </ul> |

CIS, carcinoma in situ; EAU, European Association of Urology; HG, high grade; LG, low grade; NMIBC, non-muscle invasive bladder cancer; WHO, World Health Organization
