# Supplementary material for: Validation of non‐muscle‐invasive bladder cancer risk stratification updated in the 2021 European Association of Urology guidelines
Source: PubMed Central journal article supplement (PMC10869660; doi:10.1002/bco2.305), 2023-11-03
Supplement: BCO2-5-269-s003.pdf [file BCO2-5-269-s003.pdf]

**Table S3. Clinicopathologic variables and comparison according to the 2021 EAU risk stratification in the BCG cohort**

| Variables                                         |                              | Total         | The 2021 EAU risk grouping |                   |                |                |
|---------------------------------------------------|------------------------------|---------------|----------------------------|-------------------|----------------|----------------|
|                                                   |                              |               | Low risk                   | Intermediate risk | High risk      | Very high risk |
| N                                                 |                              | 3024 (100%)   | 0                          | 548 (18%)         | 1745 (58%)     | 731 (24%)      |
| Age at TURBT                                      | Median (interquartile range) | 72 (65–78)    | -                          | 69 (63–76)        | 72 (66–78)     | 73 (66–79)     |
| Sex                                               | Male                         | 2,497 (82.6%) | -                          | 451 (82.3%)       | 1,431 (82.0%)  | 615 (84.1%)    |
|                                                   | Female                       | 527 (17.4%)   | -                          | 97 (17.7%)        | 314 (18.0%)    | 116 (15.8%)    |
| Prior recurrence history                          | Primary case                 | 2,273 (75.2%) | -                          | 270 (49.3%)       | 1,344 (77.0%)  | 659 (90.2%)    |
|                                                   | Recurrent case (0–1/year)    | 751 (24.8%)   | -                          | 278 (50.7%)       | 401 (23.0%)    | 72 (9.8%)      |
| Tumor multifocality                               | Single                       | 1871 (61.9%)  | -                          | 321 (58.6%)       | 1178 (67.5%)   | 372 (50.9%)    |
|                                                   | Multifocal (2–3)             | 774 (25.6%)   | -                          | 131 (23.9%)       | 407 (23.3%)    | 236 (32.3%)    |
|                                                   | Multifocal (4<)              | 379 (12.5%)   | -                          | 96 (17.5%)        | 160 (9.2%)     | 123 (16.8%)    |
| Tumor size                                        | <3 cm                        | 1,862 (61.6%) | -                          | 411 (75.0%)       | 1,053 (60.3%)  | 398 (54.4%)    |
|                                                   | ≥3 cm                        | 505 (16.7%)   | -                          | 56 (10.2%)        | 221 (12.7%)    | 228 (31.2%)    |
|                                                   | Unknown                      | 657 (21.7%)   | -                          | 81 (14.8%)        | 471 (27.0%)    | 105 (14.4%)    |
| T category                                        | Ta                           | 925 (30.6%)   | -                          | 511 (93.2%)       | 368 (21.1%)    | 46 (6.3%)      |
|                                                   | T1                           | 1,495 (49.4%) | -                          | 37 (6.8%)         | 804 (46.1%)    | 654 (89.5%)    |
|                                                   | Tis                          | 604 (20.0%)   | -                          | 0 (0.0%)          | 573 (32.8%)    | 31 (4.2%)      |
| Tumor grade (WHO1973)                             | G1                           | 79 (2.6%)     | -                          | 65 (11.9%)        | 14 (0.8%)      | 0 (0.0%)       |
|                                                   | G2                           | 939 (31.1%)   | -                          | 367 (67.0%)       | 479 (27.4%)    | 93 (12.7%)     |
|                                                   | G3                           | 2,006 (66.3%) | -                          | 116 (21.2%)       | 1,252 (71.7%)  | 638 (87.3%)    |
| Tumor grade (WHO2004/2016)                        | Low-grade                    | 330 (10.9%)   | -                          | 273 (49.8%)       | 55 (3.2%)      | 2 (0.3%)       |
|                                                   | High-grade                   | 2,694 (89.1%) | -                          | 275 (50.2%)       | 1,690 (96.8%)  | 729 (99.7%)    |
| Concurrent carcinoma in situ                      | No                           | 2,122 (70.2%) | -                          | 548 (100.0%)      | 1,350 (77.4%)  | 224 (30.6%)    |
|                                                   | Yes                          | 902 (29.8%)   | -                          | 0 (0.0%)          | 395 (22.6%)    | 507 (69.4%)    |
| Non-urothelial carcinoma variant histology        | No                           | 2,922 (96.6%) | -                          | 548 (100.0%)      | 1,745 (100.0%) | 629 (86.0%)    |
|                                                   | Divergent differentiation    | 73 (2.4%)     | -                          | 0 (0.0%)          | 0 (0.0%)       | 73 (10.0%)     |
|                                                   | Variant morphologies         | 29 (1.0%)     | -                          | 0 (0.0%)          | 0 (0.0%)       | 29 (4.0%)      |
| Lymphovascular invasion                           | No                           | 2,886 (95.4%) | -                          | 548 (100.0%)      | 1,745 (100.0%) | 593 (81.1%)    |
|                                                   | Yes                          | 138 (4.6%)    | -                          | 0 (0.0%)          | 0 (0.0%)       | 138 (18.9%)    |
| Restaging/repeat TUR                              | No                           | 2005 (66.3%)  | -                          | 462 (85.3%)       | 1240 (71.1%)   | 303 (41.5%)    |
|                                                   | Performed                    | 1019 (33.7%)  | -                          | 86 (15.7%)        | 505 (28.9%)    | 428 (58.5%)    |
| Immediate postoperative intravesical chemotherapy | No                           | 2183 (72.2%)  | -                          | 350 (63.8%)       | 1268 (72.5%)   | 566 (77.3%)    |
|                                                   | Performed                    | 841 (27.8%)   | -                          | 198 (36.1%)       | 477 (27.3%)    | 166 (22.7%)    |
| Maintenance BCG followed by induction BCG         | No                           | 2508 (82.9%)  | -                          | 419 (76.5%)       | 1456 (83.4%)   | 633 (86.6%)    |
|                                                   | Performed                    | 516 (17.1%)   | -                          | 129 (23.5%)       | 289 (16.6%)    | 98 (13.4%)     |

EAU, European Association of Urology; TURBT, transurethral resection of the bladder tumor; WHO, the World Health Organization; BCG, bacillus Calmette-Guerin
