# Supplementary material for: Validation of non‐muscle‐invasive bladder cancer risk stratification updated in the 2021 European Association of Urology guidelines
Source: PubMed Central journal article supplement (PMC10869660; doi:10.1002/bco2.305), 2023-11-03
Supplement: BCO2-5-269-s004.pdf [file BCO2-5-269-s004.pdf]

**Table S4. Clinicopathologic variables and comparison according to the 2021 EAU risk stratification in the non-BCG cohort**

| Variables                                         | Total                        | The 2021 EAU risk grouping |                   |              |              |             |
|---------------------------------------------------|------------------------------|----------------------------|-------------------|--------------|--------------|-------------|
|                                                   |                              | Low risk                   | Intermediate risk | High risk    | Highest risk |             |
| N                                                 | 789                          | 173 (22%)                  | 269 (34%)         | 217 (28%)    | 130 (16%)    |             |
| Age at TURBT                                      | Median (interquartile range) | 71 (63–78)                 | 65 (59–73)        | 71 (62–78)   | 73 (66–80)   | 72 (67–78)  |
| Sex                                               | Male                         | 663 (84.0%)                | 142 (82.1%)       | 229 (85.1%)  | 183 (84.3%)  | 109 (83.8%) |
|                                                   | Female                       | 126 (16.0%)                | 31 (17.9%)        | 40 (14.9%)   | 34 (15.7%)   | 21 (16.1%)  |
| Prior recurrence history                          | Primary case                 | 619 (78.5%)                | 135 (78.0%)       | 202 (75.0%)  | 169 (78.0%)  | 113 (86.9%) |
|                                                   | Recurrent case (0–1/year)    | 170 (21.5%)                | 38 (22.0%)        | 67 (25.0%)   | 48 (22.0%)   | 17 (13.1%)  |
| Tumor Multifocal                                  | Single                       | 464 (59.1%)                | 144 (83.2%)       | 168 (62.4%)  | 102 (47.0%)  | 52 (40.0%)  |
|                                                   | Multifocal (2–8)             | 323 (40.9%)                | 29 (16.8%)        | 101 (37.6%)  | 115 (53.0%)  | 78 (60.0%)  |
| Tumor size                                        | <3 cm                        | 663 (84.0%)                | 168 (97.1%)       | 241 (89.6%)  | 169 (77.9%)  | 85 (65.4%)  |
|                                                   | ≥3 cm                        | 126 (16.0%)                | 5 (2.9%)          | 28 (10.4%)   | 48 (22.1%)   | 45 (34.6%)  |
| T category                                        | Ta                           | 449 (56.9%)                | 169 (97.7%)       | 229 (85.1%)  | 47 (21.7%)   | 4 (3.1%)    |
|                                                   | T1                           | 331 (42.0%)                | 4 (2.3%)          | 40 (14.9%)   | 161 (74.2%)  | 126 (96.9%) |
|                                                   | Tis                          | 9 (1.1%)                   | 0 (0.0%)          | 0 (0.0%)     | 9 (4.1%)     | 0 (0.0%)    |
| Tumor grade (WHO1973)                             | G1                           | 196 (24.9%)                | 152 (87.9%)       | 43 (16.0%)   | 128 (59.0%)  | 1 (0.7%)    |
|                                                   | G2                           | 378 (47.9%)                | 0 (0.0%)          | 211 (78.4%)  | 78 (35.9%)   | 39 (30.0%)  |
|                                                   | G3                           | 176 (22.3%)                | 0 (0.0%)          | 9 (3.3%)     | 11 (5.1%)    | 89 (68.6%)  |
|                                                   | Undefined                    | 39 (4.9%)                  | 21 (12.1%)        | 6 (2.3%)     | 0 (0.0%)     | 1 (0.7%)    |
| Tumor grade (WHO2004/2016)                        | Low-grade                    | 493 (62.5%)                | 173 (100%)        | 243 (90.3%)  | 75 (34.6%)   | 2 (1.5%)    |
|                                                   | High-grade                   | 296 (37.5%)                | 0 (0.0%)          | 26 (9.7%)    | 142 (65.4%)  | 128 (98.5%) |
| Concurrent carcinoma in situ                      | No                           | 686 (87.0%)                | 173 (100%)        | 269 (100%)   | 184 (84.8%)  | 60 (46.2%)  |
|                                                   | Yes                          | 103 (13.0%)                | 0 (0.0%)          | 0 (0.0%)     | 33 (15.2%)   | 70 (53.8%)  |
| Non-urothelial carcinoma variant histology        | No                           | 765 (97.0%)                | 173 (100%)        | 269 (100.0%) | 217 (100.0%) | 106 (81.5%) |
|                                                   | Divergent differentiation    | 11 (1.4%)                  | 0 (0.0%)          | 0 (0.0%)     | 0 (0.0%)     | 11 (8.5%)   |
|                                                   | Variant morphologies         | 13 (1.6%)                  | 0 (0.0%)          | 0 (0.0%)     | 0 (0.0%)     | 13 (10.0%)  |
| Lymphovascular invasion                           | No                           | 709 (89.9%)                | 173 (100%)        | 269 (100%)   | 210 (96.8%)  | 57 (43.8%)  |
|                                                   | Yes                          | 63 (8.0%)                  | 0 (0.0%)          | 0 (0.0%)     | 0 (0.0%)     | 63 (48.5%)  |
|                                                   | Unknown                      | 17 (2.1%)                  | 0 (0.0%)          | 0 (0.0%)     | 7 (3.2%)     | 10 (7.7%)   |
| Restaging/repeat TUR                              | No                           | 751 (95.2%)                | 172 (99.9%)       | 265 (98.5%)  | 202 (93.1%)  | 113 (86.9%) |
|                                                   | Performed                    | 38 (4.8%)                  | 1 (0.1%)          | 4 (1.5%)     | 15 (6.9%)    | 17 (13.1%)  |
| Immediate postoperative intravesical chemotherapy | No                           | 623 (72.0%)                | 149 (86.1%)       | 212 (78.8%)  | 160 (73.7%)  | 104 (80.0%) |
|                                                   | Performed                    | 166 (21.0%)                | 24 (13.9%)        | 57 (21.2%)   | 57 (26.3%)   | 26 (20.0%)  |
| Maintenance intravesical chemotherapy             | No                           | 769 (81.3%)                | 154 (89.0%)       | 220 (81.8%)  | 164 (75.6%)  | 107 (82.3%) |
|                                                   | Performed                    | 144 (18.7%)                | 19 (11.0%)        | 49 (18.2%)   | 53 (24.4%)   | 23 (17.7%)  |

EAU, European Association of Urology; TURBT, transurethral resection of the bladder tumor; WHO, the World Health Organization; BCG, bacillus Calmette-Guerin
